# Supplementary material
Source: PubMed Central journal article supplement (PMC8983564)

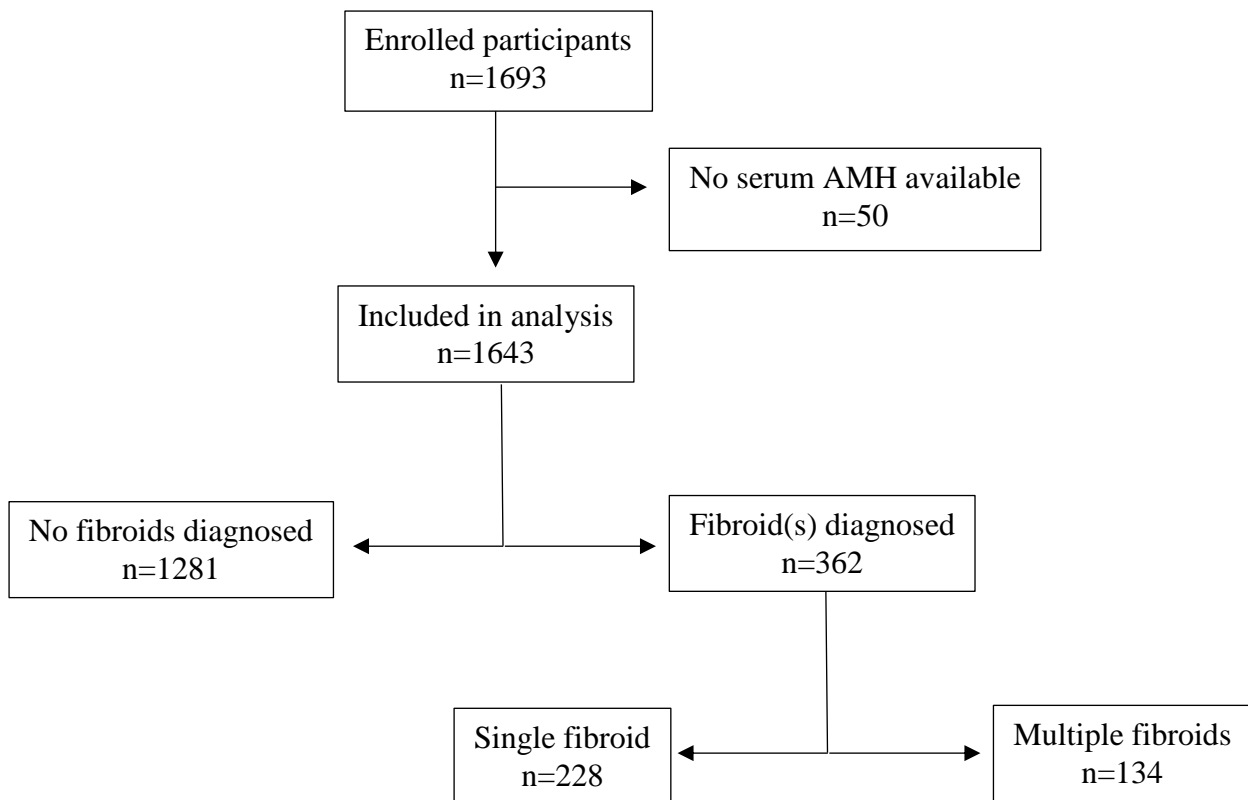

Supplement: NIHMS1775939-supplement-2.pdf [file NIHMS1775939-supplement-2.pdf]
